# Supplementary material for: MoS2 quantum dot decorated g-C3N4 composite photocatalyst with enhanced hydrogen evolution performance
Source: Royal Society of Chemistry journal article supplement (doi:10.1039/c6ra07060d), 2016-01-01
Supplement: c6ra07060d1.pdf [file c6ra07060d1.pdf]

## Supporting Information:

### MoS<sub>2</sub> quantum dots decorated g-C<sub>3</sub>N<sub>4</sub> composite photocatalyst with enhanced hydrogen evolution performance

Xixiong Jin, Xiangqian Fan, Jianjian Tian, Ruolin Cheng, Mengli Li, Lingxia Zhang\*

*State Key Laboratory of High Performance Ceramics and Superfine Microstructure, Shanghai Institute of Ceramics, Chinese Academy of Sciences, 1295 Ding-xi Road, Shanghai 200050, People's Republic of China*

Corresponding author: [zhlingxia@mail.sic.ac.cn](mailto:zhlingxia@mail.sic.ac.cn) Tel: +86-21-52412706; Fax: +86-21-52413122

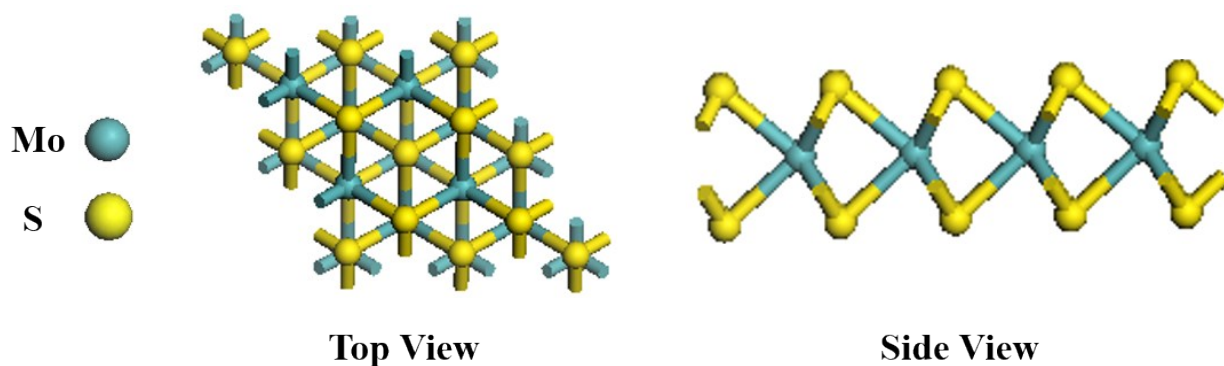

Figure S1. The crystal structure of MoS<sub>2</sub>

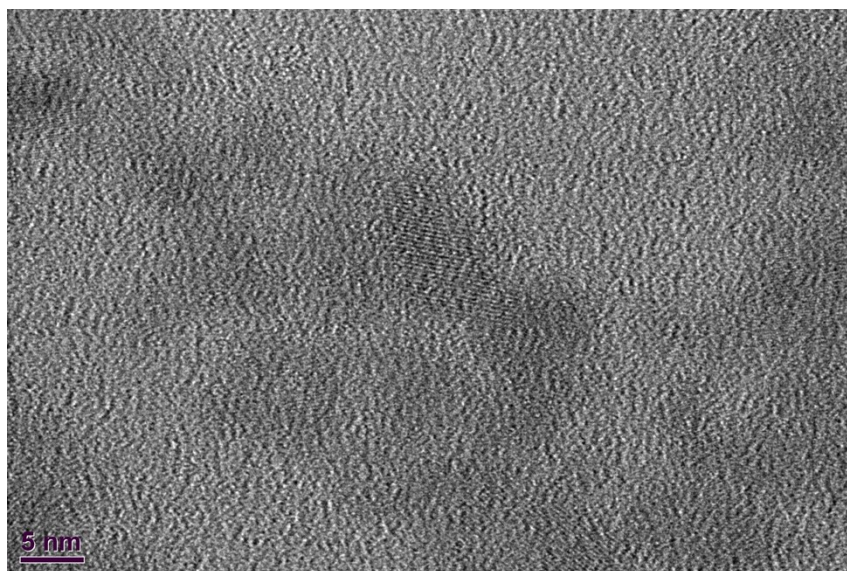

Figure S2. HRTEM images of 7wt% MoS<sub>2</sub>-QDs/CN

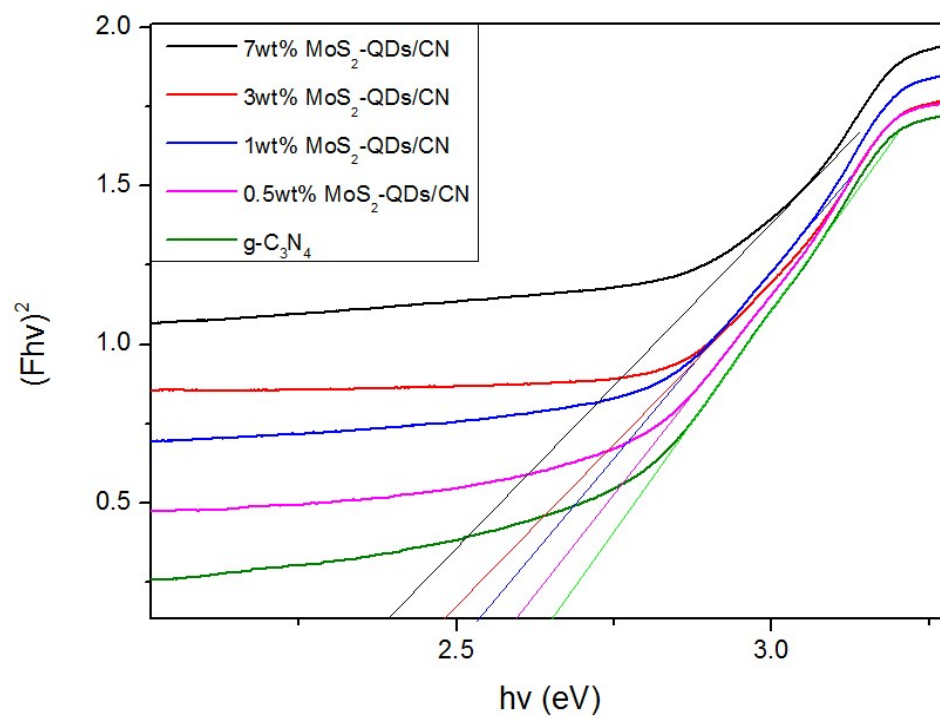

Figure S3. Band-gap calculation spectra of g-C<sub>3</sub>N<sub>4</sub> and MoS<sub>2</sub>-QDs/CN composite

Table S1. Band-gap of g-C<sub>3</sub>N<sub>4</sub> and MoS<sub>2</sub>-QDs/CN composite

| <b>Sample</b>                   | <b>Band-gap (eV)</b> |
|---------------------------------|----------------------|
| 7wt% MoS <sub>2</sub> -QDs/CN   | 2.38                 |
| 3wt% MoS <sub>2</sub> -QDs/CN   | 2.48                 |
| 1wt% MoS <sub>2</sub> -QDs/CN   | 2.53                 |
| 0.5wt% MoS <sub>2</sub> -QDs/CN | 2.59                 |
| g-C <sub>3</sub> N <sub>4</sub> | 2.65                 |

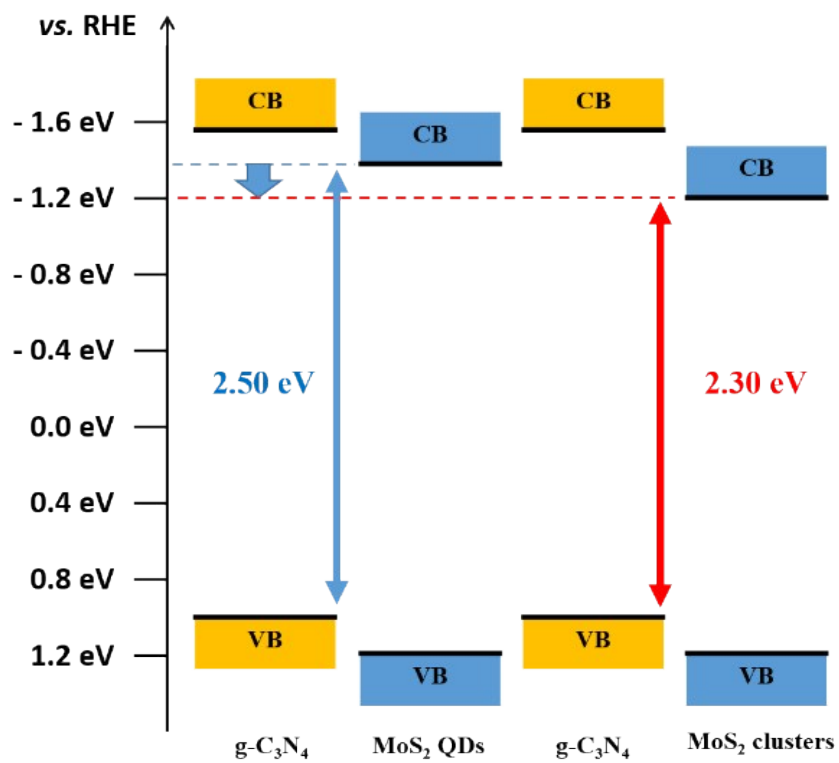

Figure S4. Explanation of the shrinkage of the band gap of the MoS<sub>2</sub>-QDs/CN composite: As increased amount of MoS<sub>2</sub>-QDs is introduced into g-C<sub>3</sub>N<sub>4</sub>, MoS<sub>2</sub>-QDs are more likely to form nanoclusters, thus narrow the band gap of MoS<sub>2</sub>-QDs and even the composite<sup>1-4</sup>.

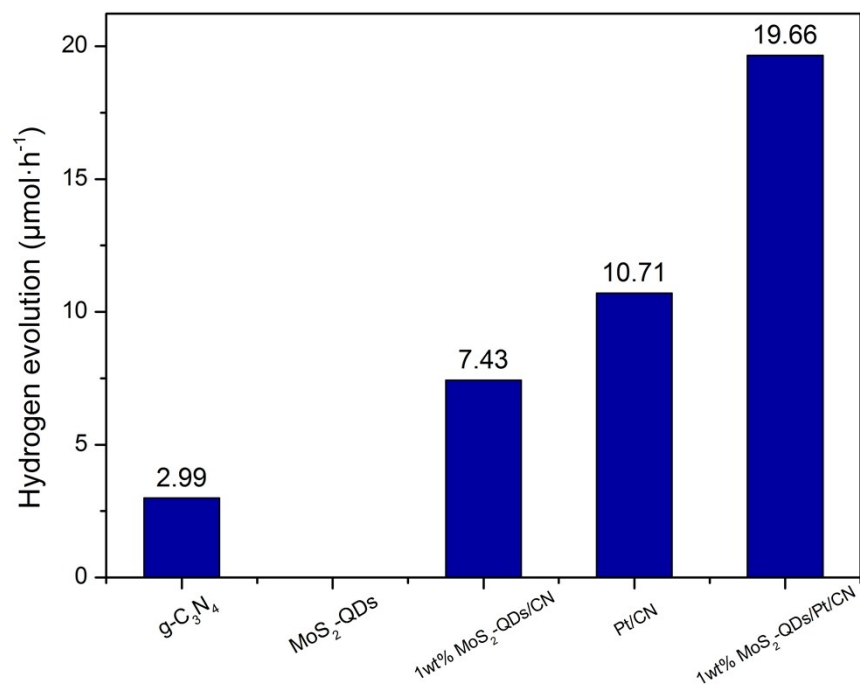

Figure S5. Photocatalytic H<sub>2</sub> evolution on g-C<sub>3</sub>N<sub>4</sub> without Pt, MoS<sub>2</sub>-QDs without Pt, 1wt% MoS<sub>2</sub>-QDs/CN without Pt, g-C<sub>3</sub>N<sub>4</sub> loaded with 1 wt% Pt (Pt/CN) and 1wt% MoS<sub>2</sub>-QDs/CN loaded with 1 wt% Pt (1wt% MoS<sub>2</sub>-QDs/Pt/CN).

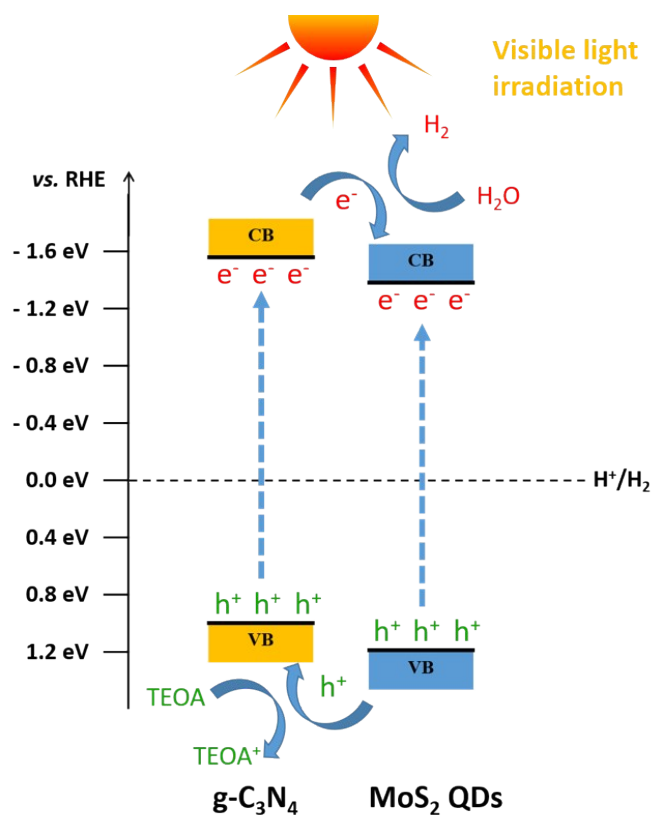

Figure S6. Schematic illustration of the electron-hole pair separation and transfer in the  $\text{MoS}_2$ -QDs/CN composite

- 1 H. L. Wang and J. A. Turner, *J. Electrochem. Soc.*, 2010, **157**, F173–F178.
- 2 T. Z. Markus, M. Wu, L. Wang, D. H. Waldeck, D. Oron and R. Naaman, *J. Phys. Chem. C*, 2009, **113**, 14200-14206.
- 3 F. A. Frame, E. C. Carroll, D. S. Larsen, M. Sarahan, N. D. Browning and F. E. Osterloh, *Chem. Commun.*, 2008, **19**, 2206-2208.
- 4 L. Liao, Q. Zhang, Z. Su, Z. Zhao, Y. Wang, Y. Li, X. Lu, D. Wei, G. Feng, Q. Yu, X. Cai, J. Zhao, Z. Ren, H. Fang, F. Robles-Hernandez, S. Baldelli and J. Bao, *Nat. Nanotechnol.*, 2014, **9**, 69–73.
